# Supplementary material for: The Lyme disease agent co-opts adiponectin receptor-mediated signaling in its arthropod vector
Source: eLife. 2021 Nov 16;10:e72568. doi: 10.7554/eLife.72568 (PMC8639152; doi:10.7554/eLife.72568)
Supplement: Figure 1—source data 1. [file elife-72568-fig1-data1.xlsx]

## Sheet: Fig.1
Fig. 1A			Fig. 1B			Fig. 1C			Fig. 1D			Fig. 1F
Uninfected	B. burgdorferi		ds GFP	ds ISARL		ds GFP	ds ISARL		ds GFP	ds ISARL		7d-Skin		14d-Skin		21d-Skin		21d-Heart		21d-Joint
1.70192	8.53872		0.298888	0.177785		2.6	3.1		1.47119	0.0663029		17.5348	33.6344	50.4431	29.1583	80.9503	52.2441	56.4283	40.6682	621.567	168.342
0.0760336	3.06682		1.95584	0.197943		3.3	5.3		0.016689	0.00380029		20.6759	25.2254	10.7445	0	58.0209	26.1579	44.6858	23.8669	205.559	187.597
0.285868	1.62473		2.61817	0.321985		4.6	4.8		5.34849	0.00733238		19.7797	3.82216	97.9137	275.19	0	52.3615	45.2734	35.1791	120.401	107.822
0.0151871	2.20003		1.16309	0.52447		3.1	2.8		231.884	0.0106847		17.2693	36.1352	1.73074	141.023	26.6575	70.6005	44.9951	55.3566	157.53	163.522
0.125981	4.82659		0.944334	0.524958		3.8	3.2		1.3981	0.00344008		61.222	0.7216	0.73165	191.96			42.6901	54.7514	217.402	180.558
0.13964	4.11891		1.24253	0.0361027		2.8	3		0.174231	0.0363217
0.310995	4.12861		8.23651	0.172911		4.5	2.3		0.122098	0.00420217
0.145276	4.49462		0.369906	0.283799		4.7	5.8		0.118562	0.152991
0.430039	4.45092		1.13981	0.0960033		5.5	4		0.157185	0.049063
0.51416	0.528123		5.80998	1.18326		3.2	3.2		4.7605	0.0233975
0.360777	0.613054
0.349399	1.07856
	0.731269
	1.08423
	0.964131
	0.750356
	1.01455
	0.649243
	0.422086
	0.0709212
	0.395024
Mann Whitney test			Mann Whitney test			Mann Whitney test			Mann Whitney test			Mann Whitney test		Mann Whitney test		Mann Whitney test		Mann Whitney test		Mann Whitney test
P value	<0.0001		P value	0.0015		P value	0.8392		P value	0.0005		P value	>0.9999	P value	0.3095	P value	>0.9999	P value	0.4206	P value	0.4206
Exact or approximate P value?	Exact		Exact or approximate P value?	Exact		Exact or approximate P value?	Exact		Exact or approximate P value?	Exact		Exact or approximate P value?	Exact	Exact or approximate P value?	Exact	Exact or approximate P value?	Exact	Exact or approximate P value?	Exact	Exact or approximate P value?	Exact
P value summary	****		P value summary	**		P value summary	ns		P value summary	***		P value summary	ns	P value summary	ns	P value summary	ns	P value summary	ns	P value summary	ns
Significantly different (P < 0.05)?	Yes		Significantly different (P < 0.05)?	Yes		Significantly different (P < 0.05)?	No		Significantly different (P < 0.05)?	Yes		Significantly different (P < 0.05)?	No	Significantly different (P < 0.05)?	No	Significantly different (P < 0.05)?	No	Significantly different (P < 0.05)?	No	Significantly different (P < 0.05)?	No
One- or two-tailed P value?	Two-tailed		One- or two-tailed P value?	Two-tailed		One- or two-tailed P value?	Two-tailed		One- or two-tailed P value?	Two-tailed		One- or two-tailed P value?	Two-tailed	One- or two-tailed P value?	Two-tailed	One- or two-tailed P value?	Two-tailed	One- or two-tailed P value?	Two-tailed	One- or two-tailed P value?	Two-tailed
Sum of ranks in column A,B	105 , 456		Sum of ranks in column A,B	145 , 65		Sum of ranks in column A,B	108 , 102		Sum of ranks in column A,B	148 , 62		Sum of ranks in column A,B	28 , 27	Sum of ranks in column A,B	22 , 33	Sum of ranks in column A,B	18 , 18	Sum of ranks in column A,B	32 , 23	Sum of ranks in column A,B	32 , 23
Mann-Whitney U	27		Mann-Whitney U	10		Mann-Whitney U	47		Mann-Whitney U	7		Mann-Whitney U	12	Mann-Whitney U	7	Mann-Whitney U	8	Mann-Whitney U	8	Mann-Whitney U	8
