# Supplementary material for: The Lyme disease agent co-opts adiponectin receptor-mediated signaling in its arthropod vector
Source: eLife. 2021 Nov 16;10:e72568. doi: 10.7554/eLife.72568 (PMC8639152; doi:10.7554/eLife.72568)
Supplement: Figure 2—figure supplement 1—source data 1. [file elife-72568-fig2-figsupp1-data1.xlsx]

## Sheet: EXT Data Fig. 3
3HADH				ADSS				GMPS				PDE				GP				FOXRED2				Reeler				AMP				ODC				PTDSS1				Ncam				V-ATPase				ACTN
RNA-Seq		qPCR		RNA-Seq		qPCR		RNA-Seq		qPCR		RNA-Seq		qPCR		RNA-Seq		qPCR		RNA-Seq		qPCR		RNA-Seq		qPCR		RNA-Seq		qPCR		RNA-Seq		qPCR		RNA-Seq		qPCR		RNA-Seq		qPCR		RNA-Seq		qPCR		RNA-Seq
ds GFP	ds ISARL	ds GFP	ds ISARL	ds GFP	ds ISARL	ds GFP	ds ISARL	ds GFP	ds ISARL	ds GFP	ds ISARL	ds GFP	ds ISARL	ds GFP	ds ISARL	ds GFP	ds ISARL	ds GFP	ds ISARL	ds GFP	ds ISARL	ds GFP	ds ISARL	ds GFP	ds ISARL	ds GFP	ds ISARL	ds GFP	ds ISARL	ds GFP	ds ISARL	ds GFP	ds ISARL	ds GFP	ds ISARL	ds GFP	ds ISARL	ds GFP	ds ISARL	ds GFP	ds ISARL	ds GFP	ds ISARL	ds GFP	ds ISARL	ds GFP	ds ISARL	ds GFP	ds ISARL
0	-1.08985	-0.0458419	1.99555	0	-0.649923	1.65256	-1.09353	0	-0.531947	2.10193	-2.04322	0	-0.612276	3.41495	-1.8365	0	-0.588614	3.41225	0.577536	0	-2.87906	-4.90143	-1.56112	0	-2.67854	4.922	-6.76226	0	-1.42708	1.77691	-1.84598	0	-0.701244	2.70435	-1.19462	0	-0.529598	2.62767	-2.52896	0	-0.437193	4.35427	-2.67135	0	-0.4144	5.83105	-5.30418	0	-1.05182
0	-1.08985	-4.8241	1.97117	0	-0.649923	-1.58243	-1.91109	0	-0.531947	-2.80673	-1.91594	0	-0.612276	-2.30796	-2.40591	0	-0.588614	-1.89392	-0.330514	0	-2.87906	1.54908	-1.17161	0	-2.67854	-7.23325	-6.71791	0	-1.42708	-4.29368	-1.70083	0	-0.701244	-3.60764	-0.509391	0	-0.529598	-2.28413	-2.58519	0	-0.437193	-2.50416	-2.3301	0	-0.4144	-3.07451	-4.41424	0	-1.05182
0	-1.08985	-1.03072	-4.36188	0	-0.649923	-0.59661	-1.11362	0	-0.531947	-0.0227518	-1.87889	0	-0.612276	0.0890806	-2.52843	0	-0.588614	-0.576195	-0.735207	0	-2.87906	1.24604	-4.33715	0	-2.67854	3.65644	-3.02184	0	-1.42708	0.365279	-3.83941	0	-0.701244	0.238172	-1.34157	0	-0.529598	-0.716915	-0.857527	0	-0.437193	-1.48795	-2.64136	0	-0.4144	-1.15848	-2.63554	0	-1.05182
0	-1.08985	-4.44502	-6.35973	0	-0.649923	-0.768195	0.58655	0	-0.531947	-3.28283	-0.537842	0	-0.612276	-2.11189	0.0617863	0	-0.588614	-1.54559	0.778034	0	-2.87906	4.54984	2.23178	0	-2.67854	-0.616529	-0.394302	0	-1.42708	-0.667321	0.848769	0	-0.701244	-1.78803	2.74196	0	-0.529598	-2.78739	-1.94118	0	-0.437193	-2.03596	-1.09549	0	-0.4144	-3.99935	-0.471786	0	-1.05182
0	-1.08985	-1.90318	-8.32075	0	-0.649923	0.74274	-0.791538	0	-0.531947	1.31845	-1.89607	0	-0.612276	3.05131	-1.40256	0	-0.588614	2.07425	-0.734239	0	-2.87906	0.900825	-3.68922	0	-2.67854	-1.70248	-3.37047	0	-1.42708	1.56068	-2.41882	0	-0.701244	1.65386	-1.26757	0	-0.529598	1.15348	-1.88901	0	-0.437193	2.58237	-1.85927	0	-0.4144	4.35323	-1.14361	0	-1.05182
0	-1.08985	-2.02925	-9.21664	0	-0.649923	-0.630293	-0.548478	0	-0.531947	-0.342629	-3.36906	0	-0.612276	-0.381835	-2.15319	0	-0.588614	0.512814	-0.893367	0	-2.87906	-5.71991	-1.67	0	-2.67854	0.512068	-0.47327	0	-1.42708	0.0834458	-0.989737	0	-0.701244	1.18647	-1.42523	0	-0.529598	-0.339162	-2.08883	0	-0.437193	-1.58511	-3.25652	0	-0.4144	-1.94936	-3.63133	0	-1.05182
0	-1.08985	-3.60847	-5.65628	0	-0.649923	-0.559326	-0.0072003	0	-0.531947	-1.8579	0.275135	0	-0.612276	-1.22182	-0.13609	0	-0.588614	-0.64154	-0.731285	0	-2.87906	-3.09357	2.04155	0	-2.67854	-3.00459	-0.0475611	0	-1.42708	-2.64791	2.11538	0	-0.701244	-1.00135	-0.234178	0	-0.529598	-0.5559	-0.887872	0	-0.437193	-2.47326	-1.04608	0	-0.4144	-2.63006	1.147	0	-1.05182
0	-1.08985	-6.76766	-2.06913	0	-0.649923	-0.487573	-0.535349	0	-0.531947	-1.56506	-0.421204	0	-0.612276	-2.68126	-1.09893	0	-0.588614	-0.350973	-0.37165	0	-2.87906	3.08325	-4.18603	0	-2.67854	-0.225601	-0.388835	0	-1.42708	-1.08139	-2.03602	0	-0.701244	-0.153343	-0.293617	0	-0.529598	-0.544737	-0.290359	0	-0.437193	-2.45445	-1.9456	0	-0.4144	-2.468	-4.57706	0	-1.05182
0	-1.08985	7.53423	-2.22491	0	-0.649923	0.952467	-1.4598	0	-0.531947	2.51198	-1.71746	0	-0.612276	2.00118	-2.11901	0	-0.588614	1.18354	-1.10911	0	-2.87906	-1.81108	-1.91551	0	-2.67854	1.1496	-5.55977	0	-1.42708	1.36335	-1.19428	0	-0.701244	-0.936514	-0.528075	0	-0.529598	0.296728	-2.4314	0	-0.437193	1.88142	-2.83852	0	-0.4144	1.87369	-4.26389	0	-1.05182
0	-1.08985	5.6011	-1.80035	0	-0.649923	1.72082	-1.66493	0	-0.531947	2.0086	-1.43929	0	-0.612276	-1.60133	-1.502	0	-0.588614	-3.55386	-0.733976	0	-2.87906	4.19696	0.149685	0	-2.67854	2.54235	0.0356674	0	-1.42708	1.89257	-1.31153	0	-0.701244	3.70285	0.0469264	0	-0.529598	3.56557	-2.43711	0	-0.437193	4.45584	-3.15851	0	-0.4144	2.03872	-4.90937	0	-1.05182
0	-1.08985	3.79854	-4.19417	0	-0.649923	-1.05336	-0.382105	0	-0.531947	-1.04691	-0.155815	0	-0.612276	1.74958	-0.207561	0	-0.588614	-0.449525	1.13847	0	-2.87906		0.508984	0	-2.67854		3.07961	0	-1.42708	-1.13061	0.778877	0	-0.701244	-2.08677	1.77951	0	-0.529598	-0.638819	-0.767305	0	-0.437193	-1.58177	-0.969486	0	-0.4144	-2.01376	0.105535	0	-1.05182
0	-1.08985	7.72037		0	-0.649923	0.609193		0	-0.531947	2.98385		0	-0.612276			0	-0.588614	1.82875		0	-2.87906			0	-2.67854			0	-1.42708	2.77868		0	-0.701244	0.0879521		0	-0.529598	0.223606		0	-0.437193	0.848743		0	-0.4144	3.19683		0	-1.05182
Mann Whitney test				Mann Whitney test				Mann Whitney test				Mann Whitney test				Mann Whitney test				Mann Whitney test				Mann Whitney test				Mann Whitney test				Mann Whitney test				Mann Whitney test				Mann Whitney test				Mann Whitney test				Mann Whitney test
P value	0.0908			P value	0.0908			P value	0.0908			P value	0.1932			P value	0.7987			P value	0.4262			P value	0.1734			P value	0.1507			P value	0.6947			P value	0.007			P value	0.0374			P value	0.0317			P value	0.0512
Exact or approximate P value?	Exact			Exact or approximate P value?	Exact			Exact or approximate P value?	Exact			Exact or approximate P value?	Exact			Exact or approximate P value?	Exact			Exact or approximate P value?	Exact			Exact or approximate P value?	Exact			Exact or approximate P value?	Exact			Exact or approximate P value?	Exact			Exact or approximate P value?	Exact			Exact or approximate P value?	Exact			Exact or approximate P value?	Exact			Exact or approximate P value?	Exact
P value summary	ns			P value summary	ns			P value summary	ns			P value summary	ns			P value summary	ns			P value summary	ns			P value summary	ns			P value summary	ns			P value summary	ns			P value summary	**			P value summary	*			P value summary	*			P value summary	ns
Significantly different (P < 0.05)?	No			Significantly different (P < 0.05)?	No			Significantly different (P < 0.05)?	No			Significantly different (P < 0.05)?	No			Significantly different (P < 0.05)?	No			Significantly different (P < 0.05)?	No			Significantly different (P < 0.05)?	No			Significantly different (P < 0.05)?	No			Significantly different (P < 0.05)?	No			Significantly different (P < 0.05)?	Yes			Significantly different (P < 0.05)?	Yes			Significantly different (P < 0.05)?	Yes			Significantly different (P < 0.05)?	No
One- or two-tailed P value?	Two-tailed			One- or two-tailed P value?	Two-tailed			One- or two-tailed P value?	Two-tailed			One- or two-tailed P value?	Two-tailed			One- or two-tailed P value?	Two-tailed			One- or two-tailed P value?	Two-tailed			One- or two-tailed P value?	Two-tailed			One- or two-tailed P value?	Two-tailed			One- or two-tailed P value?	Two-tailed			One- or two-tailed P value?	Two-tailed			One- or two-tailed P value?	Two-tailed			One- or two-tailed P value?	Two-tailed			One- or two-tailed P value?	Two-tailed
Sum of ranks in column A,B	172 , 104			Sum of ranks in column A,B	172 , 104			Sum of ranks in column A,B	172 , 104			Sum of ranks in column A,B	147 , 106			Sum of ranks in column A,B	155 , 145			Sum of ranks in column A,B	122 , 109			Sum of ranks in column A,B	130 , 101			Sum of ranks in column A,B	168 , 108			Sum of ranks in column A,B	151 , 125			Sum of ranks in column A,B	187 , 89			Sum of ranks in column A,B	178 , 98			Sum of ranks in column A,B	179 , 97			Sum of ranks in column A,B	176 , 100
Mann-Whitney U	38			Mann-Whitney U	38			Mann-Whitney U	38			Mann-Whitney U	40			Mann-Whitney U	67			Mann-Whitney U	43			Mann-Whitney U	35			Mann-Whitney U	42			Mann-Whitney U	59			Mann-Whitney U	23			Mann-Whitney U	32			Mann-Whitney U	31			Mann-Whitney U	34
[truncated: 22 more columns]
