# Supplementary material for: The Lyme disease agent co-opts adiponectin receptor-mediated signaling in its arthropod vector
Source: eLife. 2021 Nov 16;10:e72568. doi: 10.7554/eLife.72568 (PMC8639152; doi:10.7554/eLife.72568)
Supplement: Figure 2—figure supplement 2—source data 1. [file elife-72568-fig2-figsupp2-data1.xlsx]

## Sheet: EXT Data Fig. 4
Ncam			V-ATPase			SFXN			3HADH			ADSS			GMPS			ACTN
qPCR			qPCR			qPCR			qPCR			qPCR			qPCR			qPCR
ds GFP	ds ISARL		ds GFP	ds ISARL		ds GFP	ds ISARL		ds GFP	ds ISARL		ds GFP	ds ISARL		ds GFP	ds ISARL		ds GFP	ds ISARL
4.35427	-2.67135		5.83105	-5.30418		0.211368	-2.88335		-0.0458419	1.99555		1.65256	-1.09353		2.10193	-2.04322		3.44105	-2.60975
-2.50416	-2.3301		-3.07451	-4.41424		-1.62928	-2.5204		-4.8241	1.97117		-1.58243	-1.91109		-2.80673	-1.91594		-2.32644	-1.51525
-1.48795	-2.64136		-1.15848	-2.63554		0.946832	-1.41131		-1.03072	-4.36188		-0.59661	-1.11362		-0.0227518	-1.87889		0.188765	-1.67236
-2.03596	-1.09549		-3.99935	-0.471786		-2.22974	-0.723028		-4.44502	-6.35973		-0.768195	0.58655		-3.28283	-0.537842		-0.971198	-0.829462
2.58237	-1.85927		4.35323	-1.14361		1.43453	-1.25468		-1.90318	-8.32075		0.74274	-0.791538		1.31845	-1.89607		1.03225	-2.30781
-1.58511	-3.25652		-1.94936	-3.63133		-0.0598663	-3.24717		-2.02925	-9.21664		-0.630293	-0.548478		-0.342629	-3.36906		-0.74766	-3.12018
-2.47326	-1.04608		-2.63006	1.147		-1.28685	0.0812886		-3.60847	-5.65628		-0.559326	-0.0072003		-1.8579	0.275135		-3.34731	0.374596
-2.45445	-1.9456		-2.468	-4.57706		-1.69435	-0.847065		-6.76766	-2.06913		-0.487573	-0.535349		-1.56506	-0.421204		-1.56206	-2.07976
1.88142	-2.83852		1.87369	-4.26389		1.17473	-3.08402		7.53423	-2.22491		0.952467	-1.4598		2.51198	-1.71746		0.519356	-3.16201
4.45584	-3.15851		2.03872	-4.90937		1.5743	-2.29482		5.6011	-1.80035		1.72082	-1.66493		2.0086	-1.43929		4.76359	-1.84876
-1.58177	-0.969486		-2.01376	0.105535		-0.703237	0.769649		3.79854	-4.19417		-1.05336	-0.382105		-1.04691	-0.155815		-1.71544	-0.102954
0.848743			3.19683			2.26157			7.72037			0.609193			2.98385			0.725094
Mann Whitney test			Mann Whitney test			Mann Whitney test			Mann Whitney test			Mann Whitney test			Mann Whitney test			Mann Whitney test
P value	0.0374		P value	0.0317		P value	0.0188		P value	0.0908		P value	0.0908		P value	0.0908		P value	0.0512
Exact or approximate P value?	Exact		Exact or approximate P value?	Exact		Exact or approximate P value?	Exact		Exact or approximate P value?	Exact		Exact or approximate P value?	Exact		Exact or approximate P value?	Exact		Exact or approximate P value?	Exact
P value summary	*		P value summary	*		P value summary	*		P value summary	ns		P value summary	ns		P value summary	ns		P value summary	ns
Significantly different (P < 0.05)?	Yes		Significantly different (P < 0.05)?	Yes		Significantly different (P < 0.05)?	Yes		Significantly different (P < 0.05)?	No		Significantly different (P < 0.05)?	No		Significantly different (P < 0.05)?	No		Significantly different (P < 0.05)?	No
One- or two-tailed P value?	Two-tailed		One- or two-tailed P value?	Two-tailed		One- or two-tailed P value?	Two-tailed		One- or two-tailed P value?	Two-tailed		One- or two-tailed P value?	Two-tailed		One- or two-tailed P value?	Two-tailed		One- or two-tailed P value?	Two-tailed
Sum of ranks in column A,B	178 , 98		Sum of ranks in column A,B	179 , 97		Sum of ranks in column A,B	182 , 94		Sum of ranks in column A,B	172 , 104		Sum of ranks in column A,B	172 , 104		Sum of ranks in column A,B	172 , 104		Sum of ranks in column A,B	176 , 100
Mann-Whitney U	32		Mann-Whitney U	31		Mann-Whitney U	28		Mann-Whitney U	38		Mann-Whitney U	38		Mann-Whitney U	38		Mann-Whitney U	34
