# Supplementary material for: The Lyme disease agent co-opts adiponectin receptor-mediated signaling in its arthropod vector
Source: eLife. 2021 Nov 16;10:e72568. doi: 10.7554/eLife.72568 (PMC8639152; doi:10.7554/eLife.72568)
Supplement: Figure 2—figure supplement 3—source data 1. [file elife-72568-fig2-figsupp3-data1.xlsx]

## Sheet: EXT Data Fig. 5
A							B							C							D							E							F							G
Relative expression		Engorgement		ng flab/1000 ng actin			Relative expression		Engorgement		ng flab/1000 ng actin			Relative expression		Engorgement		ng flab/1000 ng actin			Relative expression		Engorgement		ng flab/1000 ng actin			Relative expression		Engorgement		ng flab/1000 ng actin			Relative expression		Engorgement		ng flab/1000 ng actin			Relative expression		Engorgement		ng flab/1000 ng actin
dsGFP	dsNCAM	dsGFP	dsNCAM	dsGFP	dsNCAM		dsGFP	dsV-ATPase	dsGFP	dsV-ATPase	dsGFP	dsV-ATPase		dsGFP	dsSFXN	dsGFP	dsSFXN	dsGFP	dsSFXN		dsGFP	ds3HADH	dsGFP	ds3HADH	dsGFP	ds3HADH		dsGFP	dsADSS	dsGFP	dsADSS	dsGFP	dsADSS		dsGFP	dsGMPS	dsGFP	dsGMPS	dsGFP	dsGMPS		dsGFP	dsACTN	dsGFP	dsACTN	dsGFP	dsACTN
0.853972	0.166995	2.9	2.8	40.8194	134.55		1.0899	0.226386	3.9	3.7	25.9172	2.44468		1.97949	0.607961	4.4	2.8	1.40829	0.455114		2.43823	0.279929	5.1	3.2	1181.83	46.2735		0.413158	0.257212	2.9	2.7	93.4057	32.7342		0.461035	1.0212	5.3	5.5	2.70513	179.486		0.933305	0.17256	5	4.7	15.3013	0.4498
2.62355	0.299441	3.4	2.9	17.3401	13.1344		0.683099	0.764839	3.4	4.6	434.16	48.6357		0.418518	0.107319	4.6	2.6	0.108363	6.57205		4.54723	0.166073	4.9	4.9	96.388	1.93048		3.41126	0.562964	2.6	2.8	43.6534	5.63474		1.00402	1.13661	4.2	4.7	77.6415	50.4638		3.92302	0.346898	4.8	2.9	47.9541	9.85802
0.140022	0.312179	2.8	4.8	0.123652	27.1433		0.328899	0.252173	2.5	3.3	1.75268	499.648		1.25574	0.00877649	4.5	3.5	1.59774	4.35468		1.0274	0.396844	3	5	35.0429	3.03806		1.15822	1.15859	4.2	3.1	109.988	111.52		0.618464	0.603805	2.6	4.3	17.5056	22.6785		1.80635	0.529588	2.9	4	0.279507	0.818558
0.650435	0.81324	2.9	4.3	0.834753	8.94687		5.81009	0.118606	2.3	4.6	459.804	25.5828		1.49354	0.226716	5.6	4.3	0.593543	1015.2		0.119579	0.0343308	4.9	4.2	46.6788	0.478941		2.05716	0.300528	4.5	2.5	497.279	6.38444		2.31559	0.180949	3.3	4.7	144.896	35.6778		1.38135	0.457819	2.7	2.8	3.13994	0.948524
0.207231	0.0568953	3.3	3.1	0.166473	136.79		2.00661	0.13713	5	2.8	2.04107	34.4019		4.92993	0.175979	4.5	4.5	250.281	86.9522		0.509941	0.0124102	2.5	3.1	2.83073	1.12212		2.33577	0.938671	4.9	3.1	86.3552	15.1817		2.45457	0.797585	2.9	5	57.54	122.272		0.188119	1.2463	2.5	2.8	1.07904	3.1993
0.578345	0.204657	4.6	5	1.61956	4.90255		1.47812	0.312014	2.3	2.8	92.6877	109.729		0.658499	0.360728	2.6	2.9	0.0442486	37.0816		3.42626	0.584777	3.4	4.7	1008.02	142.657		0.570061	0.0642127	4.5	4.5	5.52381	18.4929		0.837644	0.0382096	4.9	4.5	38.6861	35.9596		1.67312	0.107837	4.1	4.7	7.80808	86.6733
0.198202	0.099266	2.2	2.8	0.57255	4.41536									0.262021	0.024417	4.7	3.1	0.224559	86.9054		0.935328	0.0495652	2.6	2	2.96844	75.9225		0.365855	0.608372	4.6	2.6	2.55586	123.014		1.91886	0.463424	2.7	3	132.927	18.6707		0.0646217	0.149904	2.5	5.4	0.0555416	0.0422851
1.06485	0.732165	4.2	3	2.01782	4.05474									0.444563	0.669377	3.1	2.9	18.2425	10.6358		0.766843	0.0732838	2.9	3.1	259.017	16.9993		1.6151	0.853388	2.7	3	62.7598	84.5842		0.455195	0.245879	3.6	5	400.609	17.714		0.267054	1.14544	4	4.6	1.35734	3.97866
7.40746	0.199813	2.8	2.9	4.26369	0.309778									0.71529		2.6		55.9099			0.64394	0.15929	4.9	2.7	35.2103	2.13031		0.634943	0.754549	4.1	4.3	105.699	79.185		0.572071	0.277729	4.5	3.1	114.402	9.02115		1.7274	0.0599446	4.6	4.8	8.88582	6.52469
4.76363	0.0458209	2.2	3	45.8228	0.0927727									0.196176		2.8		229.151			0.0348636	0.0697804	2.5	2.5	3.03517	0.773242		0.976604	0.238619	2.7	4.5	21.985	72.2494		7.06275	0.00184074	3.2	3.7	862.026	250.265		2.30559	0.83868	2.6	3.2	9.78637	0.295243
														4.07883		2.7		427.221			0.504945	0.0451196	3.3	2.6	3.39711	21.1306		0.468678	0.288254	4.4	2.9	57.6163	28.3575									1.80038		4.5		1.66984
														2.97363		3.2		162.741			0.419301	0.390005	2.6	4.7		2.33798		1.30234	0.359967	3.8	3.3	428.059	17.3292									2.81042		3.2		28.7132
Mann Whitney test		Mann Whitney test		Mann Whitney test			Mann Whitney test		Mann Whitney test		Mann Whitney test			Mann Whitney test		Mann Whitney test		Mann Whitney test			Mann Whitney test		Mann Whitney test		Mann Whitney test			Mann Whitney test		Mann Whitney test		Mann Whitney test			Mann Whitney test		Mann Whitney test		Mann Whitney test			Mann Whitney test		Mann Whitney test		Mann Whitney test
P value	0.0288	P value	0.3356	P value	0.315		P value	0.0087	P value	0.4459	P value	0.8182		P value	0.0041	P value	0.4141	P value	0.5714		P value	0.0014	P value	0.9432	P value	0.0374		P value	0.0121	P value	0.2117	P value	0.3186		P value	0.0288	P value	0.1274	P value	0.315		P value	0.0138	P value	0.2878	P value	0.4176
Exact or approximate P value?	Exact	Exact or approximate P value?	Exact	Exact or approximate P value?	Exact		Exact or approximate P value?	Exact	Exact or approximate P value?	Exact	Exact or approximate P value?	Exact		Exact or approximate P value?	Exact	Exact or approximate P value?	Exact	Exact or approximate P value?	Exact		Exact or approximate P value?	Exact	Exact or approximate P value?	Exact	Exact or approximate P value?	Exact		Exact or approximate P value?	Exact	Exact or approximate P value?	Exact	Exact or approximate P value?	Exact		Exact or approximate P value?	Exact	Exact or approximate P value?	Exact	Exact or approximate P value?	Exact		Exact or approximate P value?	Exact	Exact or approximate P value?	Exact	Exact or approximate P value?	Exact
P value summary	*	P value summary	ns	P value summary	ns		P value summary	**	P value summary	ns	P value summary	ns		P value summary	**	P value summary	ns	P value summary	ns		P value summary	**	P value summary	ns	P value summary	*		P value summary	*	P value summary	ns	P value summary	ns		P value summary	*	P value summary	ns	P value summary	ns		P value summary	*	P value summary	ns	P value summary	ns
Significantly different (P < 0.05)?	Yes	Significantly different (P < 0.05)?	No	Significantly different (P < 0.05)?	No		Significantly different (P < 0.05)?	Yes	Significantly different (P < 0.05)?	No	Significantly different (P < 0.05)?	No		Significantly different (P < 0.05)?	Yes	Significantly different (P < 0.05)?	No	Significantly different (P < 0.05)?	No		Significantly different (P < 0.05)?	Yes	Significantly different (P < 0.05)?	No	Significantly different (P < 0.05)?	Yes		Significantly different (P < 0.05)?	Yes	Significantly different (P < 0.05)?	No	Significantly different (P < 0.05)?	No		Significantly different (P < 0.05)?	Yes	Significantly different (P < 0.05)?	No	Significantly different (P < 0.05)?	No		Significantly different (P < 0.05)?	Yes	Significantly different (P < 0.05)?	No	Significantly different (P < 0.05)?	No
One- or two-tailed P value?	Two-tailed	One- or two-tailed P value?	Two-tailed	One- or two-tailed P value?	Two-tailed		One- or two-tailed P value?	Two-tailed	One- or two-tailed P value?	Two-tailed	One- or two-tailed P value?	Two-tailed		One- or two-tailed P value?	Two-tailed	One- or two-tailed P value?	Two-tailed	One- or two-tailed P value?	Two-tailed		One- or two-tailed P value?	Two-tailed	One- or two-tailed P value?	Two-tailed	One- or two-tailed P value?	Two-tailed		One- or two-tailed P value?	Two-tailed	One- or two-tailed P value?	Two-tailed	One- or two-tailed P value?	Two-tailed		One- or two-tailed P value?	Two-tailed	One- or two-tailed P value?	Two-tailed	One- or two-tailed P value?	Two-tailed		One- or two-tailed P value?	Two-tailed	One- or two-tailed P value?	Two-tailed	One- or two-tailed P value?	Two-tailed
Sum of ranks in column A,B	134 , 76	Sum of ranks in column A,B	92 , 118	Sum of ranks in column A,B	91 , 119		Sum of ranks in column A,B	55 , 23	Sum of ranks in column A,B	34 , 44	Sum of ranks in column A,B	37 , 41		Sum of ranks in column A,B	162 , 48	Sum of ranks in column A,B	137 , 73	Sum of ranks in column A,B	118 , 92		Sum of ranks in column A,B	203 , 97	Sum of ranks in column A,B	151.5 , 148.5	Sum of ranks in column A,B	166 , 110		Sum of ranks in column A,B	193 , 107	Sum of ranks in column A,B	172 , 128	Sum of ranks in column A,B	168 , 132		Sum of ranks in column A,B	134 , 76	Sum of ranks in column A,B	84.50 , 125.5	Sum of ranks in column A,B	119 , 91		Sum of ranks in column A,B	175 , 78	Sum of ranks in column A,B	121.5 , 131.5	Sum of ranks in column A,B	151 , 102
Mann-Whitney U	21	Mann-Whitney U	37	Mann-Whitney U	36		Mann-Whitney U	2	Mann-Whitney U	13	Mann-Whitney U	16		Mann-Whitney U	12	Mann-Whitney U	37	Mann-Whitney U	40		Mann-Whitney U	19	Mann-Whitney U	70.5	Mann-Whitney U	32		Mann-Whitney U	29	Mann-Whitney U	50	Mann-Whitney U	54		Mann-Whitney U	21	Mann-Whitney U	29.5	Mann-Whitney U	36		Mann-Whitney U	23	Mann-Whitney U	43.5	Mann-Whitney U	47
