# Supplementary material for: The Lyme disease agent co-opts adiponectin receptor-mediated signaling in its arthropod vector
Source: eLife. 2021 Nov 16;10:e72568. doi: 10.7554/eLife.72568 (PMC8639152; doi:10.7554/eLife.72568)
Supplement: Figure 2—source data 3. [file elife-72568-fig2-data3.xlsx]

## Sheet: Fig.2
Fig. 2C			Fig. 2F			Fig. 2G			Fig. 2H							Fig. 2I			Fig. 2K
Uninfected									Relative expression		Engorgement		flab/actin Ratio						Relative expression		Engorgement		flab/actin Ratio
dsGFP	dsISARL		dsGFP	dsISARL		dsGFP	dsISARL		dsGFP	dsPTDSS1	dsGFP	dsPTDSS1	dsGFP	dsPTDSS1		Uninfected	B. burgdorferi		dsGFP	dsPSD	dsGFP	dsPSD	dsGFP	dsPSD
1.51208	0.101972		6.18026	0.173263		0.423019	0.302687		2.96343	0.636086	3.3	3.3	29521.4	57.343		1.67166	7.64369		0.597985	0.100808	3	4.8	103.016	7.52616
0.985617	0.276051		0.205309	0.16664		0.487294	0.349364		111.63	0.379907	2.7	2.9	1228.81	156.631		0.575257	2.5892		2.85818	0.202788	2.2	2.6	95.7502	3.14583
0.670991	0.261671		0.608397	0.551898		0.42003	0.299859		0.759395	0.178963	4.7	2.3	389.864	150.473		0.898499	1.05708		1.66843	0.248516	2.9	4.8	2016.11	12.3806
			0.144848	0.260404					0.419107	0.141995	2.6	2.6	7.99422	0.783038		0.941265	0.748411		1.76047	0.365642	4.8	2.7	5.814	0.746485
B. burgdorferi			2.22449	0.269991					1.11205	0.837994	3.4	2.7	209.739	232.487		0.648671	2.50247		2.41454	0.114949	4.9	2.6	110.153	4.87399
dsGFP	dsISARL		0.7905	0.235072					0.449485	0.648087	2.8	4.2	813.706	749.678		1.03947	44.8703		1.83607	0.0855486	4.3	4.3	274.718	14.4512
1.03835	0.101277		0.680232	0.540411					1.4573	0.246456	2.9	2.7	2909.26	311.667		0.559587	1.17602		0.954049	0.804596	4.5	2.3	415.906	2.72203
0.952183	0.198482		0.685517	0.817698					0.788284	0.744051	5.4	4.7	866.185	161.778		0.757782	0.423351		1.00154	0.341126	2.6	2.7	196.874	1.05325
1.01143	0.0958282		1.22836	0.185385					1.36252	0.590508	3.1	3.5	2013.67	1609.09		1.68525	1.0475		0.317619	0.538036	3.1	4.1	9.24211	63.7975
			11.8398	0.184653					3.81822		3.1		24225.8			1.54209	3.9546		0.409482	0.165892	2.3	2.9	79.3155	368.637
			0.642238	0.587514												1.15509	3.99554		0.211162	0.296129	2.5	2.9	2.06953	95.477
			1.16765													1.43258	5.68654
Unpaired t test			Mann Whitney test			Unpaired t test			Mann Whitney test		Mann Whitney test		Mann Whitney test			Mann Whitney test			Mann Whitney test		Mann Whitney test		Mann Whitney test
P value	0.0286		P value	0.007		P value	0.0097		P value	0.0057	P value	0.5876	P value	0.022		P value	0.0332		P value	0.001	P value	0.9358	P value	0.0281
P value summary	*		Exact or approximate P value?	Exact		P value summary	**		Exact or approximate P value?	Exact	Exact or approximate P value?	Exact	Exact or approximate P value?	Exact		Exact or approximate P value?	Exact		Exact or approximate P value?	Exact	Exact or approximate P value?	Exact	Exact or approximate P value?	Exact
Significantly different (P < 0.05)?	Yes		P value summary	**		Significantly different (P < 0.05)?	Yes		P value summary	**	P value summary	ns	P value summary	*		P value summary	*		P value summary	**	P value summary	ns	P value summary	*
One- or two-tailed P value?	Two-tailed		Significantly different (P < 0.05)?	Yes		One- or two-tailed P value?	Two-tailed		Significantly different (P < 0.05)?	Yes	Significantly different (P < 0.05)?	No	Significantly different (P < 0.05)?	Yes		Significantly different (P < 0.05)?	Yes		Significantly different (P < 0.05)?	Yes	Significantly different (P < 0.05)?	No	Significantly different (P < 0.05)?	Yes
t, df	t=3.350, df=4		One- or two-tailed P value?	Two-tailed		t, df	t=4.640, df=4		One- or two-tailed P value?	Two-tailed	One- or two-tailed P value?	Two-tailed	One- or two-tailed P value?	Two-tailed		One- or two-tailed P value?	Two-tailed		One- or two-tailed P value?	Two-tailed	One- or two-tailed P value?	Two-tailed	One- or two-tailed P value?	Two-tailed
			Sum of ranks in column A,B	187 , 89					Sum of ranks in column A,B	133 , 57	Sum of ranks in column A,B	107 , 83	Sum of ranks in column A,B	128 , 62		Sum of ranks in column A,B	113 , 187		Sum of ranks in column A,B	174 , 79	Sum of ranks in column A,B	128 , 125	Sum of ranks in column A,B	160 , 93
Unpaired t test			Mann-Whitney U	23					Mann-Whitney U	12	Mann-Whitney U	38	Mann-Whitney U	17		Mann-Whitney U	35		Mann-Whitney U	13	Mann-Whitney U	59	Mann-Whitney U	27
P value	<0.0001
P value summary	****
Significantly different (P < 0.05)?	Yes
One- or two-tailed P value?	Two-tailed
t, df	t=20.71, df=4
