# Supplementary material for: The Lyme disease agent co-opts adiponectin receptor-mediated signaling in its arthropod vector
Source: eLife. 2021 Nov 16;10:e72568. doi: 10.7554/eLife.72568 (PMC8639152; doi:10.7554/eLife.72568)
Supplement: Figure 3—figure supplement 1—source data 1. [file elife-72568-fig3-figsupp1-data1.xlsx]

## Sheet: EXT Data Fig. 6
A							B							C
Relative expression		Engorgement		ng flab/1000 ng actin			Relative expression		Engorgement		ng flab/1000 ng actin			G6P1		G6P2
dsGFP	dsG6P1	dsGFP	dsG6P1	dsGFP	dsG6P1		dsGFP	dsG6P2	dsGFP	dsG6P2	dsGFP	dsG6P2		Uninfected	B. burgdorferi	Uninfected	B. burgdorferi
0.340286	0.706461	2	3	0.306263	16.4647		5.79183	0.301196	3.2	4.2	2.1735	0.0712495		0.760401	0.839109	0.200675	29.6677
0.5265	0.709937	3.7	5.5	3.25515	11.7292		0.425458	0.224211	5.7	4.1	1.99784	12.542		0.795177	0.940482	0.161875	0.836679
2.5183	0.596963	3	3	1.5476	0.943297		0.935672	0.420223	4	4.3	6.95306	0.247602		0.461274	0.676589	0.178524	0.406408
8.74061	0.163805	2.4	5.3	25.8503	1.35419		1.06865	0.435345	3.4	6.4	0.11919	4.45929		0.711085	0.438107	0.192146	0.157078
8.09164	0.556997	3	2.5	29.242	0.119909		0.278575	0.691659	3.1	3.1	0.0201858	0.229621		0.184124	1.72846	0.287038	0.704619
0.796665	0.606265	3.6	4.5	46.4392	0.00309903		0.937123	0.537978	2.6	4.9	0.349929	0.843962		0.564088	3.40376	0.511785	19.7867
0.361225	0.436614	1.8	5.3	30.7564	15.724		2.92789	0.751692	2.9	4.3	0.0388095	0.0734021		0.978263	0.38535	0.24781	0.296028
0.613654	0.448938	4.4	4.8	0.00057265	0.297326		2.61015		3.2	5.6	74.3529			0.723084	0.304955	0.139241	0.151876
0.350116	0.712187	4.4	2.3	1.12238	21.9689				4.4	4.4				0.577038	0.761852	0.88939	0.349496
1.07462	0.486691	4.6	4.6	64.0808	0.127181					4.7				0.955895	1.00266	0.403817	1.15765
0.625862	0.200834	2.9	5	0.428333	0.653555					5				0.736445	2.15254	0.312479	1.69912
1.76084	0.078853	5.2	2.9	1.51986	0.0160569									0.850712	3.76047	0.921659	1.4645
1.17625		2.5	4.7	124.57
0.270302		3.1	5.6	0.0750804
1.34612		2.4		2.73597
Mann Whitney test		Mann Whitney test		Mann Whitney test			Mann Whitney test		Mann Whitney test		Mann Whitney test			Mann Whitney test		Mann Whitney test
P value	0.0414	P value	0.0297	P value	0.1138		P value	0.0401	P value	0.0234	P value	0.9551		P value	0.2189	P value	0.0519
Exact or approximate P value?	Exact	Exact or approximate P value?	Exact	Exact or approximate P value?	Exact		Exact or approximate P value?	Exact	Exact or approximate P value?	Exact	Exact or approximate P value?	Exact		Exact or approximate P value?	Exact	Exact or approximate P value?	Exact
P value summary	*	P value summary	*	P value summary	ns		P value summary	*	P value summary	*	P value summary	ns		P value summary	ns	P value summary	ns
Significantly different (P < 0.05)?	Yes	Significantly different (P < 0.05)?	Yes	Significantly different (P < 0.05)?	No		Significantly different (P < 0.05)?	Yes	Significantly different (P < 0.05)?	Yes	Significantly different (P < 0.05)?	No		Significantly different (P < 0.05)?	No	Significantly different (P < 0.05)?	No
One- or two-tailed P value?	Two-tailed	One- or two-tailed P value?	Two-tailed	One- or two-tailed P value?	Two-tailed		One- or two-tailed P value?	Two-tailed	One- or two-tailed P value?	Two-tailed	One- or two-tailed P value?	Two-tailed		One- or two-tailed P value?	Two-tailed	One- or two-tailed P value?	Two-tailed
Sum of ranks in column A,B	252 , 126	Sum of ranks in column A,B	175.5 , 259.5	Sum of ranks in column A,B	243 , 135		Sum of ranks in column A,B	82 , 38	Sum of ranks in column A,B	65 , 145	Sum of ranks in column A,B	65 , 55		Sum of ranks in column A,B	128 , 172	Sum of ranks in column A,B	116 , 184
Mann-Whitney U	48	Mann-Whitney U	55.5	Mann-Whitney U	57		Mann-Whitney U	10	Mann-Whitney U	20	Mann-Whitney U	27		Mann-Whitney U	50	Mann-Whitney U	38
