# Supplementary material for: The Lyme disease agent co-opts adiponectin receptor-mediated signaling in its arthropod vector
Source: eLife. 2021 Nov 16;10:e72568. doi: 10.7554/eLife.72568 (PMC8639152; doi:10.7554/eLife.72568)
Supplement: Figure 3—source data 1. [file elife-72568-fig3-data1.xlsx]

## Sheet: Fig.3
Fig. 3C											Fig. 3E											Fig. 3G			Fig. 3H
G6P1		G6P2		PEPCK1		PEPCK2		PEPCK3			G6P1		G6P2		PEPCK1		PEPCK2		PEPCK3			WT	Adipo-/-		Day0			Day21			Day28
GFP	Adiponectin	GFP	Adiponectin	GFP	Adiponectin	GFP	Adiponectin	GFP	Adiponectin		Adipo-/-	WT	Adipo-/-	WT	Adipo-/-	WT	Adipo-/-	WT	Adipo-/-	WT		6046.22	1541.65		PBS	104	107	PBS	104	107	PBS	104	107
0.583069	0.183975	0.723318	0.462219	3.08981	1.26587	0.622427	0.446032	1.02186	0.420532		0.774051	0.47219	0.654381	0.156358	0.485282	0.0906938	0.809526	1.1007	0.7189	1.72702		34.6634	2666.26		3.60926	2.00578	3.55822	4.09013	2.21212	4.3121	4.68369	2.194	1.73036
1.59576	0.151138	1.25098	0.442215	0.92415	1.00476	1.34942	0.329213	0.997429	0.321411		1.29824	0.254951	1.03234	0.390267	1.46927	1.77816	0.85526	0.810508	0.759812	0.917015		298.625	13251.2		4.35985	2.77681	4.19181	2.89461	1.43704	4.38164	5.89996	2.99717	0.331066
1.07476	0.169225	1.10515	0.552995	0.350208	0.883637	1.19059	0.228508	0.981131	0.220073		0.995122	0.248017	1.48029	0.339258	1.4025	2.45011	1.44435	0.64737	1.83073	0.410515		5539.28	23874.2		1.58106	3.17113	2.80084	3.17481	2.87712	5.08077	2.62162	2.80084	1.23697
																						267.399	11695.2		2.69187	3.96901	2.84578	2.57534	1.68321	2.21515	2.31327	2.15203	2.46161
																						2464.87	2721.13		3.04017	3.64086	2.69524	2.08405	3.78082	3.6132	2.66499	1.90401	5.47507
																						1855.92	3915.4
Unpaired t test		Unpaired t test		Unpaired t test		Unpaired t test		Unpaired t test			Unpaired t test		Unpaired t test		Unpaired t test		Unpaired t test		Unpaired t test			6110.87	30914.1		Mann Whitney test			Mann Whitney test			Mann Whitney test
P value	0.0351	P value	0.0283	P value	0.6569	P value	0.035	P value	0.0003		P value	0.0145	P value	0.0379	P value	0.6986	P value	0.4932	P value	0.8801		574.913	7476.64		P value	0.8413		P value	0.3095		P value	0.2222
P value summary	*	P value summary	*	P value summary	ns	P value summary	*	P value summary	***		P value summary	*	P value summary	*	P value summary	ns	P value summary	ns	P value summary	ns		456.403	1560.35		Exact or approximate P value?	Exact		Exact or approximate P value?	Exact		Exact or approximate P value?	Exact
Significantly different (P < 0.05)?	Yes	Significantly different (P < 0.05)?	Yes	Significantly different (P < 0.05)?	No	Significantly different (P < 0.05)?	Yes	Significantly different (P < 0.05)?	Yes		Significantly different (P < 0.05)?	Yes	Significantly different (P < 0.05)?	Yes	Significantly different (P < 0.05)?	No	Significantly different (P < 0.05)?	No	Significantly different (P < 0.05)?	No		92.3947	1250.98		P value summary	ns		P value summary	ns		P value summary	ns
One- or two-tailed P value?	Two-tailed	One- or two-tailed P value?	Two-tailed	One- or two-tailed P value?	Two-tailed	One- or two-tailed P value?	Two-tailed	One- or two-tailed P value?	Two-tailed		One- or two-tailed P value?	Two-tailed	One- or two-tailed P value?	Two-tailed	One- or two-tailed P value?	Two-tailed	One- or two-tailed P value?	Two-tailed	One- or two-tailed P value?	Two-tailed		5992.01	7106.61		Significantly different (P < 0.05)?	No		Significantly different (P < 0.05)?	No		Significantly different (P < 0.05)?	No
t, df	t=3.133, df=4	t, df	t=3.359, df=4	t, df	t=0.4791, df=4	t, df	t=3.136, df=4	t, df	t=11.50, df=4		t, df	t=4.131, df=4	t, df	t=3.053, df=4	t, df	t=0.4163, df=4	t, df	t=0.7533, df=4	t, df	t=0.1607, df=4		910.23	2.09742		One- or two-tailed P value?	Two-tailed		One- or two-tailed P value?	Two-tailed		One- or two-tailed P value?	Two-tailed
																						37.8309	447.639		Sum of ranks in column A,B	26 , 29		Sum of ranks in column A,B	33 , 22		Sum of ranks in column A,B	34 , 21
																						231.891	223.433		Mann-Whitney U	11		Mann-Whitney U	7		Mann-Whitney U	6
																						2471.52	231.792
																						2105.44	66.5154		Mann Whitney test			Mann Whitney test			Mann Whitney test
																						1478.57	2721.1		P value	>0.9999		P value	0.1508		P value	0.1508
																						1638.29	8175.86		Exact or approximate P value?	Exact		Exact or approximate P value?	Exact		Exact or approximate P value?	Exact
																						8679.69	47.6144		P value summary	ns		P value summary	ns		P value summary	ns
																						210.142	45.4646		Significantly different (P < 0.05)?	No		Significantly different (P < 0.05)?	No		Significantly different (P < 0.05)?	No
																						111.323	5421.13		One- or two-tailed P value?	Two-tailed		One- or two-tailed P value?	Two-tailed		One- or two-tailed P value?	Two-tailed
																						18.6937	43.266		Sum of ranks in column A,B	27 , 28		Sum of ranks in column A,B	20 , 35		Sum of ranks in column A,B	35 , 20
																						536.771	2081.79		Mann-Whitney U	12		Mann-Whitney U	5		Mann-Whitney U	5
																						808.369
																						351.495
																						6954.75
																						87.9745
																						Mann Whitney test
																						P value	0.1849
																						Exact or approximate P value?	Exact
																						P value summary	ns
																						Significantly different (P < 0.05)?	No
																						One- or two-tailed P value?	Two-tailed
																						Sum of ranks in column A,B	669 , 709
																						Mann-Whitney U	263
