# Supplementary material for: The Lyme disease agent co-opts adiponectin receptor-mediated signaling in its arthropod vector
Source: eLife. 2021 Nov 16;10:e72568. doi: 10.7554/eLife.72568 (PMC8639152; doi:10.7554/eLife.72568)
Supplement: Figure 4—source data 6. [file elife-72568-fig4-data6.xlsx]

## Sheet: Fig.4
Fig. 4B			Fig. 4C							Fig. 4L			Fig. 4M			Fig. 4N
			Relative expression		Engorgement		flab/actin Ratio
Uninfected	B. burgdorferi		dsGFP	dsC1QL3	dsGFP	dsC1QL3	dsGFP	dsC1QL3		dsGFP	dsC1QL3		Uninfected	Borrelia		Uninfected	Borrelia
2.65278	0.844057		3.83832	0.0990643	4.7	4.4	68.0428	0.00543924		1.7962	0.935341		7.08912	0.875034		7.93277	5.30398
2.59507	28.7107		46.6424	0.0828993	3.9	2.9	100.424	0.341298		7.51839	0.416548		2.00304	0.587634		0.845925	0.396589
0.576297	3.718		0.324084	0.534906	4.7	4.7	0.519432	0.149502		0.826021	0.206958		0.0574679	0.208658		0.07213	0.20966
1.8149	2.85989		0.28292	0.110064	4.4	2.5	455.305	0.231694		1.21029	0.224653		0.0212514	0.12711		0.066591	0.116884
0.548191	0.0883742		0.264331	0.275964	5	4.4	0.665256	0.706482		0.572804	0.187999		91.8033	2.70869		19.8989	2.55487
0.23696	13.1006		1.60399	0.280577	4.1	4.3	0.829884	0.263529		1.12568	0.83473		0.953457	0.106396		1.21973	0.115433
0.822547	8.28209		5.13766	0.94112	4.6	3.1	2.12722	5.0644		3.22489	0.784319		0.658791	0.187309		1.27825	0.246127
0.545106	10.5599		0.852211	0.508482	2.4	4.5	0.248628	0.362501		0.551701	0.7713			0.128232			0.162861
2.38452	8.48673		1.06134		5.2		1.43671			0.638752				0.177614			0.326841
	3.7946													1.26866			2.0424
														0.0351447			0.12359
														0.0850312			0.0862184
														1.52432			0.831203
														0.123058			0.1033
Mann Whitney test			Mann Whitney test		Mann Whitney test		Mann Whitney test			Mann Whitney test			Mann Whitney test			Mann Whitney test
P value	0.0076		P value	0.0206	P value	0.2336	P value	0.0206		P value	0.036		P value	0.3223		P value	0.4003
Exact or approximate P value?	Exact		Exact or approximate P value?	Exact	Exact or approximate P value?	Exact	Exact or approximate P value?	Exact		Exact or approximate P value?	Exact		Exact or approximate P value?	Exact		Exact or approximate P value?	Exact
P value summary	**		P value summary	*	P value summary	ns	P value summary	*		P value summary	*		P value summary	ns		P value summary	ns
Significantly different (P < 0.05)?	Yes		Significantly different (P < 0.05)?	Yes	Significantly different (P < 0.05)?	No	Significantly different (P < 0.05)?	Yes		Significantly different (P < 0.05)?	Yes		Significantly different (P < 0.05)?	No		Significantly different (P < 0.05)?	No
One- or two-tailed P value?	Two-tailed		One- or two-tailed P value?	Two-tailed	One- or two-tailed P value?	Two-tailed	One- or two-tailed P value?	Two-tailed		One- or two-tailed P value?	Two-tailed		One- or two-tailed P value?	Two-tailed		One- or two-tailed P value?	Two-tailed
Sum of ranks in column A,B	58 , 132		Sum of ranks in column A,B	105 , 48	Sum of ranks in column A,B	94 , 59	Sum of ranks in column A,B	105 , 48		Sum of ranks in column A,B	103 , 50		Sum of ranks in column A,B	91 , 140		Sum of ranks in column A,B	89 , 142
Mann-Whitney U	13		Mann-Whitney U	12	Mann-Whitney U	23	Mann-Whitney U	12		Mann-Whitney U	14		Mann-Whitney U	35		Mann-Whitney U	37
