# Supplementary material for: The Lyme disease agent co-opts adiponectin receptor-mediated signaling in its arthropod vector
Source: eLife journal article supplement (doi:10.7554/elife.72568), 2021-11-05

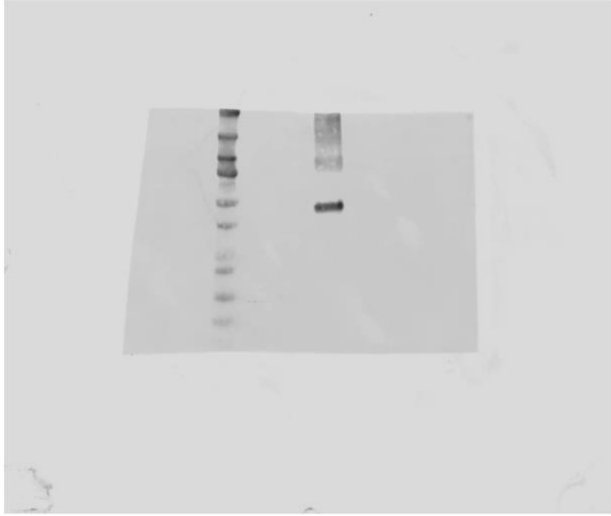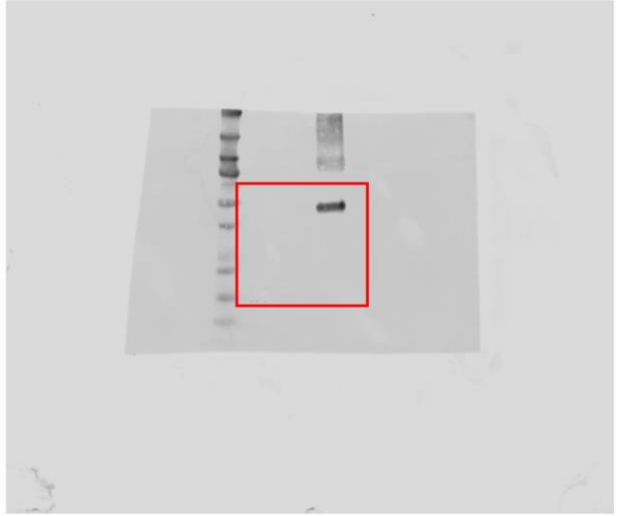

Supplement: supp [file elife-72568-supp-v1.zip]
